# Supplementary material for: Y Fuse? Sex Chromosome Fusions in Fishes and Reptiles
Source: PubMed Central journal article supplement (PMC4439076; doi:10.1371/journal.pgen.1005237), 2015-05-20
Supplement: pgen.1005237.s006.pdf [file pgen.1005237.s006.pdf]

Probability density

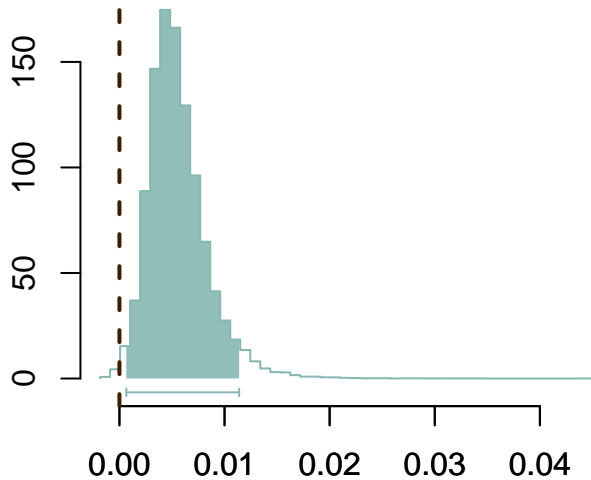

Difference between YA and XA/ZA fusion rates
