# Supplementary material for: Y Fuse? Sex Chromosome Fusions in Fishes and Reptiles
Source: PubMed Central journal article supplement (PMC4439076; doi:10.1371/journal.pgen.1005237), 2015-05-20
Supplement: pgen.1005237.s007.pdf [file pgen.1005237.s007.pdf]

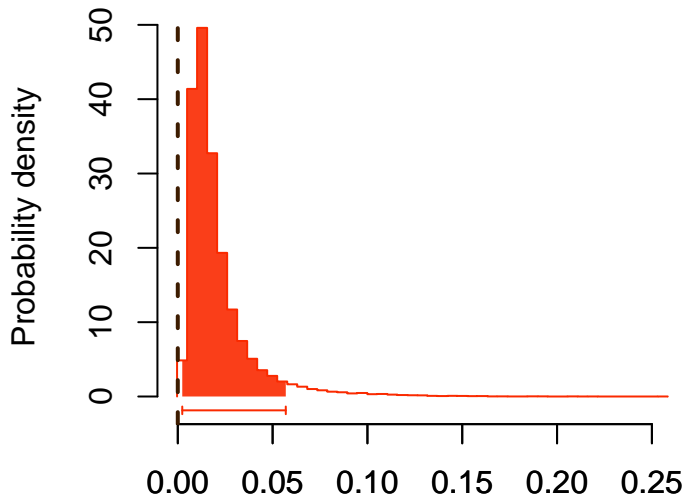

Difference between YA and WA/ZA fusion rates
